# Supplementary material
Source: PubMed Central journal article supplement (PMC1782366)
Supplement: 7601476s1.pdf [file 7601476s1.pdf]

Supplemental figure 1.

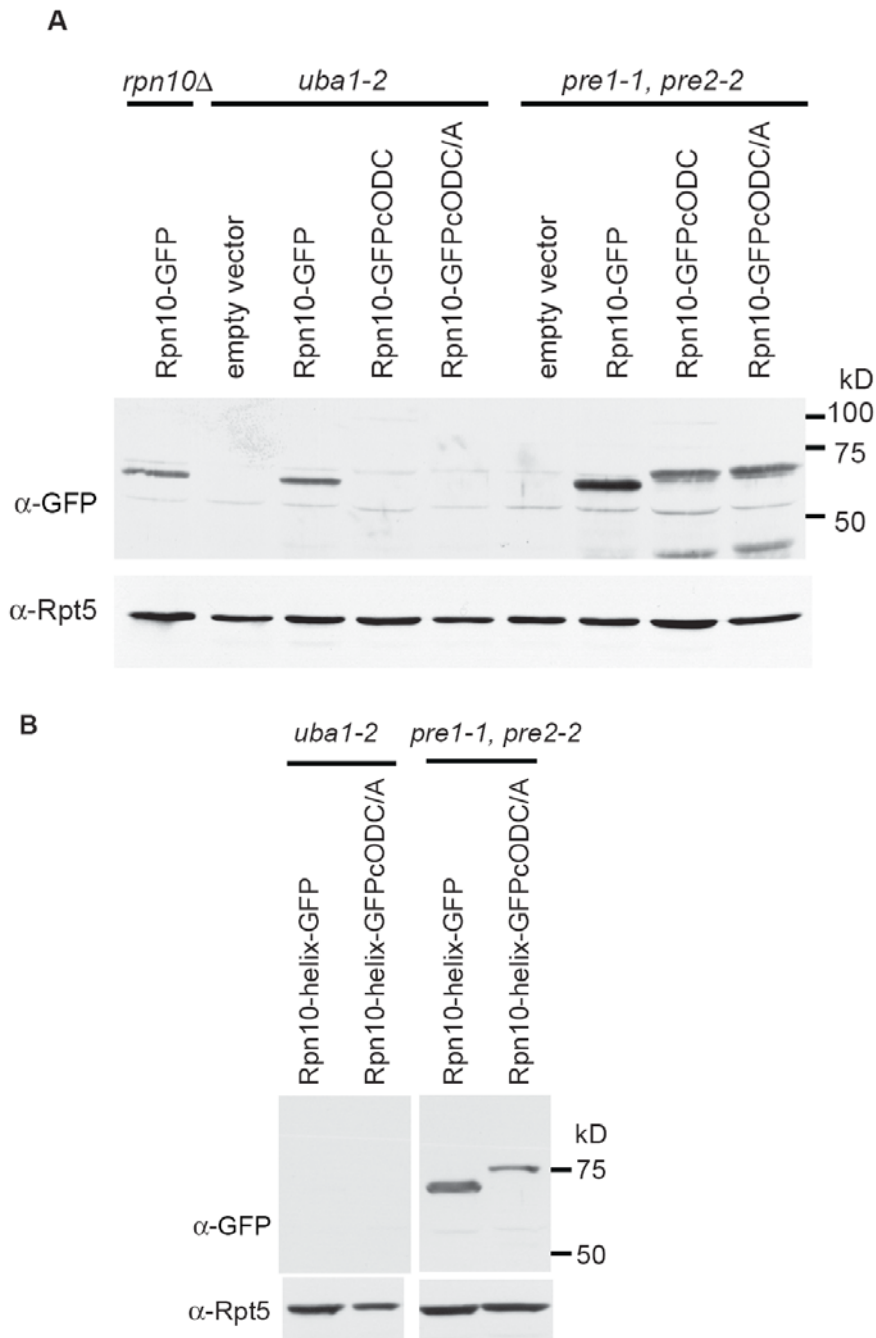

The degradation of Rpn10-fusions is ubiquitin-independent, but proteasome dependent. The ubiquitin activating enzyme mutant, *uba1-2\**, and a proteasome mutant, *pre1-1, pre2-2\*\**, expressed the indicated fusion proteins. The *uba1-2* cells were incubated at 30° C, a temperature that elicits their mutant phenotypes. the *pre1-1, pre2-2* mutant was incubated at 37° C for 2 hours before harvesting cells. Cell extracts were prepared and the level of

proteins was determined by Western blot analysis with anti-GFP. Rpt5 was immunoblotted as a loading control.

\* MHY1409: *MAT<sup>□</sup> his3-200, leu2-3,112, lys2-801, trp1-1, ura3-52, gal2, uba1-2;mTn3*  
Swanson, R. and Hochstrasser, M. (2000) A viable ubiquitin-activating enzyme mutant for evaluating ubiquitin system function in *Saccharomyces cerevisiae*. *FEBS Lett*, 477, 193-198.

\*\* WCG4-11/22a: *his3-11,15, leu2-3,112, ura3, pre1-1, pre2-2, MATa*  
Heinemeyer, W., Gruhler, A., Mohrle, V., Mahe, Y. and Wolf, D.H (1993). PRE2, highly homologous to the human major histocompatibility complex- linked RING10 gene, codes for a yeast proteasome subunit necessary for chymotryptic activity and degradation of ubiquitinated proteins. *J. Biol. Chem.*, 268: 5115 – 5120
