# Supplementary material
Source: PubMed Central journal article supplement (PMC1782366)
Supplement: 7601476s2.pdf [file 7601476s2.pdf]

Supplemental figure 2

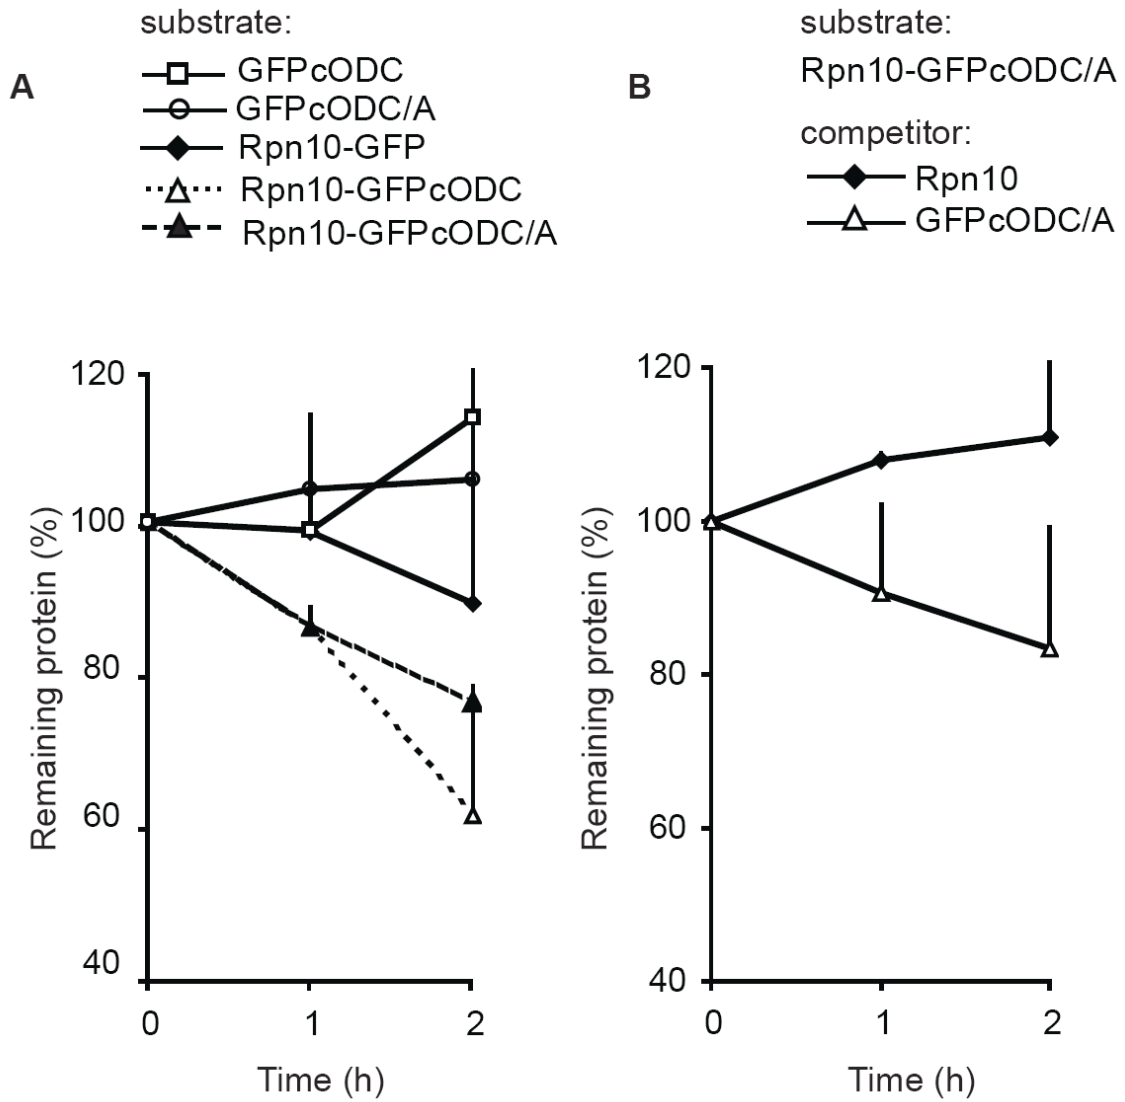

In vitro degradation of Rpn10-GFP fusion proteins by wild type proteasomes. Symbols and experiments as in figure 3, but proteasomes were wild type Rpn10 and error bars are one-sided for visual clarity.
