# Supplementary material
Source: PubMed Central journal article supplement (PMC1782366)
Supplement: 7601476s4.pdf [file 7601476s4.pdf]

## Supplement to Methods

Plasmids used in this study

|              | Protein expressed             | Vector, Marker  | Promoter |
|--------------|-------------------------------|-----------------|----------|
| pJ1/pJ40     | Rpn10-GFPuv                   | p416, URA3/HIS3 | RPT5     |
| pJ2/pJ41     | Rpn10-GFPuv-cODC              | p416, URA3/HIS3 | RPT5     |
| pJ3/pJ42     | Rpn10-GFPuv-cODC[C441A]       | p416, URA3/HIS3 | RPT5     |
| pJ33/pJ43    | Rpn10-GFPuv-cODC[C441S]       | p416, URA3/HIS3 | RPT5     |
| pJ7          | 6His-Rpn10-GFPuv              | pET28b          |          |
| pJ9          | 6His-Rpn10                    | pET28b          |          |
| pJ78         | FlagRpn10                     | p416, URA3      | GPD1     |
| p416GFPuv*   | GFPuv                         | p416, URA3      | ADH1     |
| p416GFPcODC* | GFPuvcODC                     | p416, URA3      | ADH1     |
| pJ64         | GFPuv-cODC[C441A]             | p416, URA3      | ADH1     |
| pJ65         | GFPuv-cODC[C441S]             | p416, URA3      | ADH1     |
| pJ150        | Rpn10-GFPuv-N34DHFR           | p413, HIS3      | RPT5     |
| pJ151        | Rpn10-GFPuv-cODC $\Delta$ 5   | p413, HIS3      | RPT5     |
| pJ165        | Rpn10-GFPuv-helix             | p416, URA3      | RPT5     |
| pJ163        | Rpn10-GFPuv-cODC $\Delta$ 15  | p416, URA3      | RPT5     |
| pJ164        | Rpn10-GFPuv-cODC $\Delta$ 10  | p416, URA3      | RPT5     |
| pJ173        | Rpn10-GFPuv-cODC $\Delta$ 22  | p416, URA3      | RPT5     |
| pJ176/pJ179  | Rpn10-helix-GFPuv             | p416, URA3/HIS3 | RPT5     |
| pJ177/pJ180  | Rpn10-helix-GFPuv-cODC[C441A] | p416,           | RPT5     |

|            |                                             |               |      |
|------------|---------------------------------------------|---------------|------|
|            |                                             | URA3/<br>HIS3 |      |
| pJ178      | Rpn10-GFPuv-<br>cODC[C441A]cODC[C441A]      | p416,<br>URA3 | RPT5 |
| pQEGFPcODC | 6His-GFPuv-cODC                             | pQE30         |      |
| pJ61       | 6His-GFPuv-cODC[C441A]                      | pQE30         |      |
| pJ184      | 6His-Rpn10-GFPuv-cODC                       | pET28b        |      |
| pJ185      | 6His-Rpn10-GFPuv-cODC[C441A]                | pET28b        |      |
| pJ186      | Rpn10-( $\Delta$ 13)-GFPuv                  | p416,<br>URA3 | RPT5 |
| pJ187      | Rpn10-( $\Delta$ 13)-GFPuv-cODC[C441A]      | p416,<br>URA3 | RPT5 |
| pJ189      | Rpn10-( $\Delta$ 13)-GFPuv-cODC $\Delta$ 10 | p416,<br>URA3 | RPT5 |
| pJ190      | Rpn10-( $\Delta$ 13)-GFPuv-cODC $\Delta$ 15 | p416,<br>URA3 | RPT5 |
| pJ191      | Rpn10-( $\Delta$ 13)-GFPuv-cODC $\Delta$ 22 | p416,<br>URA3 | RPT5 |

\* plasmids described in (Hoyt, 2003b)
